# Supplementary material for: Differentiation in drought tolerance mirrors the geographic distributions of alpine plants on the Qinghai-Tibet Plateau and adjacent highlands
Source: PubMed Central journal article supplement (PMC5307960; doi:10.1038/srep42466), 2017-02-14
Supplement: srep42466-s1.pdf [file srep42466-s1.pdf]

1 Differentiation in drought-tolerance mirrors the geographic distributions of alpine plants on the  
 2 Qinghai-Tibet Plateau and adjacent highlands  
 3 Li-Hua Meng, Jie Yang, Wen Guo, Bin Tian, Guang-Jie Chen, Yong-Ping Yang, Yuan-Wen Duan  
 4 Supplementary materials  
 5 Table S1. Effects of species, water stress treatment and their interaction on all measured variables  
 6 of seedlings of the four *Anisodus* species, based on two-way ANOVA. \*,  $P < 0.05$ ; \*\*,  $P < 0.01$ ; \*\*\*,  
 7  $P < 0.001$ .

| Variable                           | Species   | Water treatment | Treatment × species interaction |
|------------------------------------|-----------|-----------------|---------------------------------|
| Aboveground biomass                | 145.37*** | 61.40***        | 2.18*                           |
| Belowground biomass                | 12.47***  | 30.76***        | 5.91***                         |
| Total biomass                      | 110.84*** | 56.39***        | 3.06**                          |
| Root:shoot ratio                   | 33.64***  | 0.88            | 6.36***                         |
| Long-term water use efficiency     | 4.31**    | 0.09            | 5.89***                         |
| Maximal rate of photosynthesis     | 30.72***  | 103.47***       | 19.018***                       |
| Stomatal conductance               | 12.70***  | 83.36***        | 14.12***                        |
| Transpiration rate                 | 17.18***  | 141.17***       | 18.59***                        |
| Instantaneous water use efficiency | 4.66**    | 63.81***        | 9.43***                         |
| Maximum quantum yield of PS II     | 7.94***   | 3.89*           | 1.70                            |
| Carbon content                     | 4.46**    | 3.92*           | 0.33                            |
| Nitrogen use efficiency            | 1.81      | 10.36***        | 1.16                            |
| Carbon isotope composition         | 37.77***  | 34.19***        | 1.18                            |
